# Supplementary material
Source: PubMed Central journal article supplement (PMC6225993)

**Secondhand smoke exposure and asthma outcomes among African American and Latino children with asthma.**

Andreas M. Neophytou;<sup>a</sup> Sam S. Oh;<sup>b</sup> Marquitta White;<sup>b</sup> Angel Mak;<sup>b</sup> Donglei Hu;<sup>b</sup> Scott Huntsman;<sup>b</sup> Celeste Eng;<sup>b</sup> Denise Serebrisky;<sup>c</sup> Luisa N. Borrell;<sup>d</sup> Harold J. Farber;<sup>e</sup> Kelley Meade;<sup>f</sup> Adam Davis;<sup>f</sup> Pedro C. Avila;<sup>g</sup> Shannon M. Thyne;<sup>h</sup> William Rodríguez-Cintrón;<sup>i</sup> José R. Rodríguez-Santana;<sup>j</sup> Rajesh Kumar;<sup>k, l</sup> Emerita Brigino-Buenaventura;<sup>m</sup> Saunak Sen;<sup>n</sup> Michael A. Lenoir;<sup>o</sup> L. Keoki Williams;<sup>p, q</sup> Neal L. Benowitz;<sup>b</sup> John R. Balmes;<sup>a, b\*</sup> Ellen A. Eisen;<sup>a\*</sup> Esteban G. Burchard.<sup>b\*</sup>

ONLINE DATA SUPPLEMENT

Table S1: Demographic characteristics of the study sample of 1208 children with asthma randomly selected for cotinine analysis data and the all asthma cases (n=3388) from the GALA II and SAGE II parent studies.

| Characteristic, n (%)                       | Subsample (N=1208) | GALA II & SAGE II cases (N=3388) |
|---------------------------------------------|--------------------|----------------------------------|
| Age (mean (sd))                             | 13.1 (3.4)         | 13.4 (3.6)                       |
| Male                                        | 643 (53.2)         | 1805 (53.3)                      |
| Race/ethnicity                              |                    |                                  |
| Mexican                                     | 157 (13.0)         | 713 (21.0)                       |
| Other Latino                                | 15 (1.2)           | 447 (13.2)                       |
| Puerto Rican                                | 664 (55.0)         | 1214 (35.8)                      |
| African American                            | 372 (30.8)         | 1014 (29.9)                      |
| Maternal education*                         |                    |                                  |
| 5th grade or less                           | 25 (2.1)           | 129 (3.8)                        |
| Grades 6 <sup>th</sup> -11 <sup>th</sup>    | 201 (16.8)         | 1224 (36.1)                      |
| High school grad. or equivalent             | 326 (27.2)         | 915 (27.0)                       |
| At least some college                       | 646 (53.9)         | 1480 (43.1)                      |
| Health insurance                            | 1175 (97.3)        | 3232 (95.7)                      |
| Any current smokers reported in household*  | 258 (25.4)         | 645 (19.0)                       |
| Recruitment region                          |                    |                                  |
| Chicago                                     | 74 (6.1)           | 328 (9.7)                        |
| Houston                                     | 34 (2.8)           | 213 (6.3)                        |
| New York                                    | 81 (6.7)           | 308 (9.1)                        |
| Puerto Rico                                 | 598 (49.5)         | 1089 (32.1)                      |
| SF Bay Area                                 | 421 (34.9)         | 1450 (42.8)                      |
| Asthma control*                             |                    |                                  |
| Controlled                                  | 255 (24.3)         | 844 (27.8)                       |
| Not well controlled                         | 371 (35.3)         | 975 (32.1)                       |
| Very poorly controlled                      | 424 (40.4)         | 1216 (40.1)                      |
| Asthma exacerbations in the past 12 months* |                    |                                  |
| Hospitalizations                            | 100 (8.5)          | 250 (7.7)                        |
| ER visits                                   | 590 (50.0)         | 1483 (44.7)                      |
| Oral steroid prescription                   | 432 (36.2)         | 932 (28.4)                       |

\*Due to missingness, percentages on self-reported number of current smokers, maternal education, asthma control and exacerbations are reported based on the total number of subjects with available information.

Figure S1: Dose-response of plasma cotinine and asthma exacerbations, and asthma control (very poorly controlled vs controlled), stratified by study (GALA II vs SAGE II) from generalized additive models using penalized splines.

**GALA II**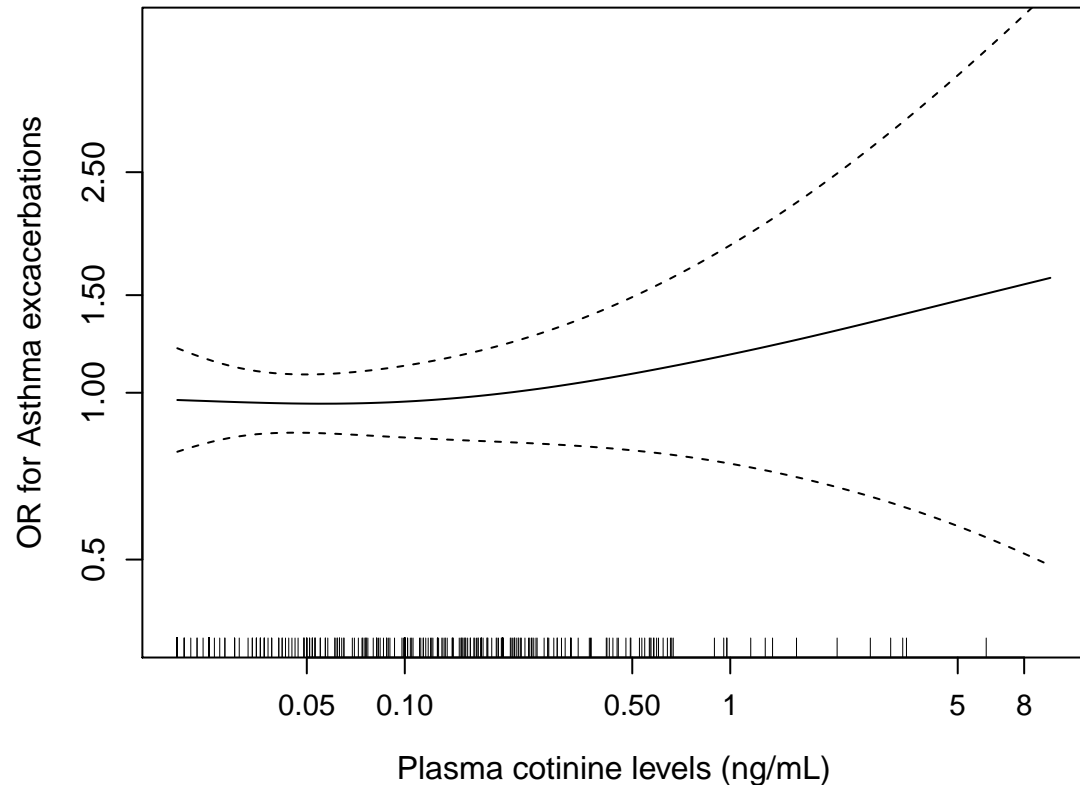**SAGE II**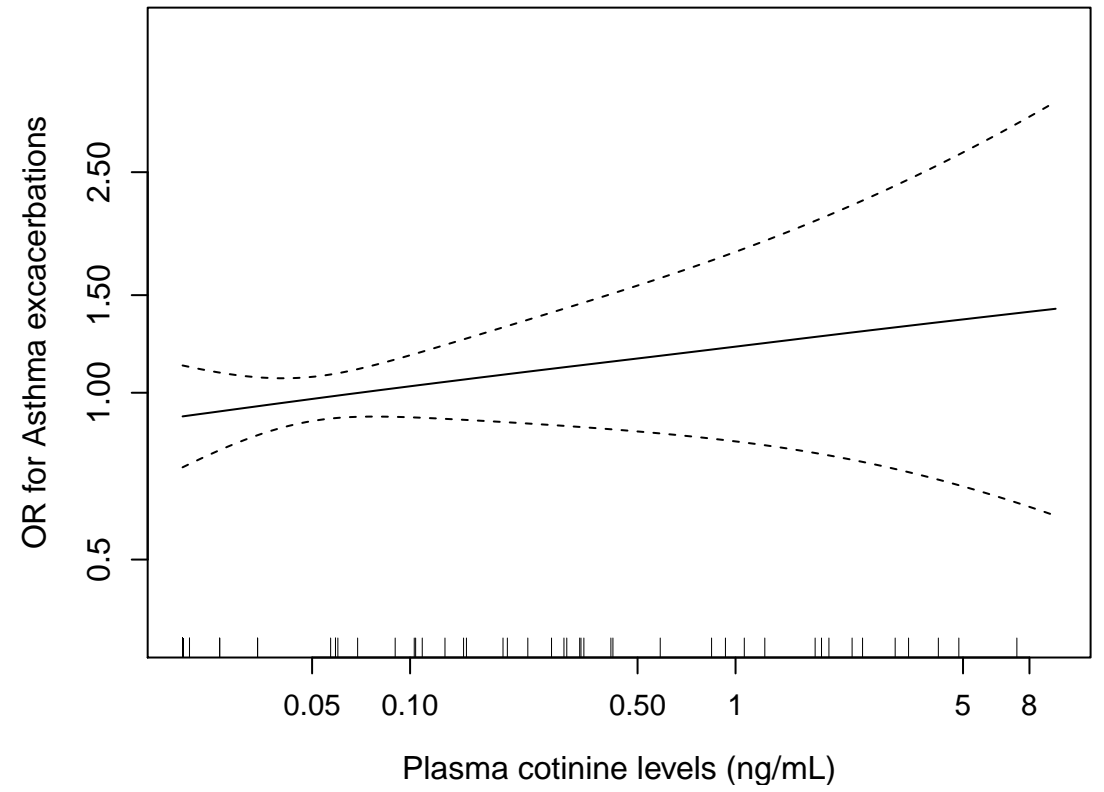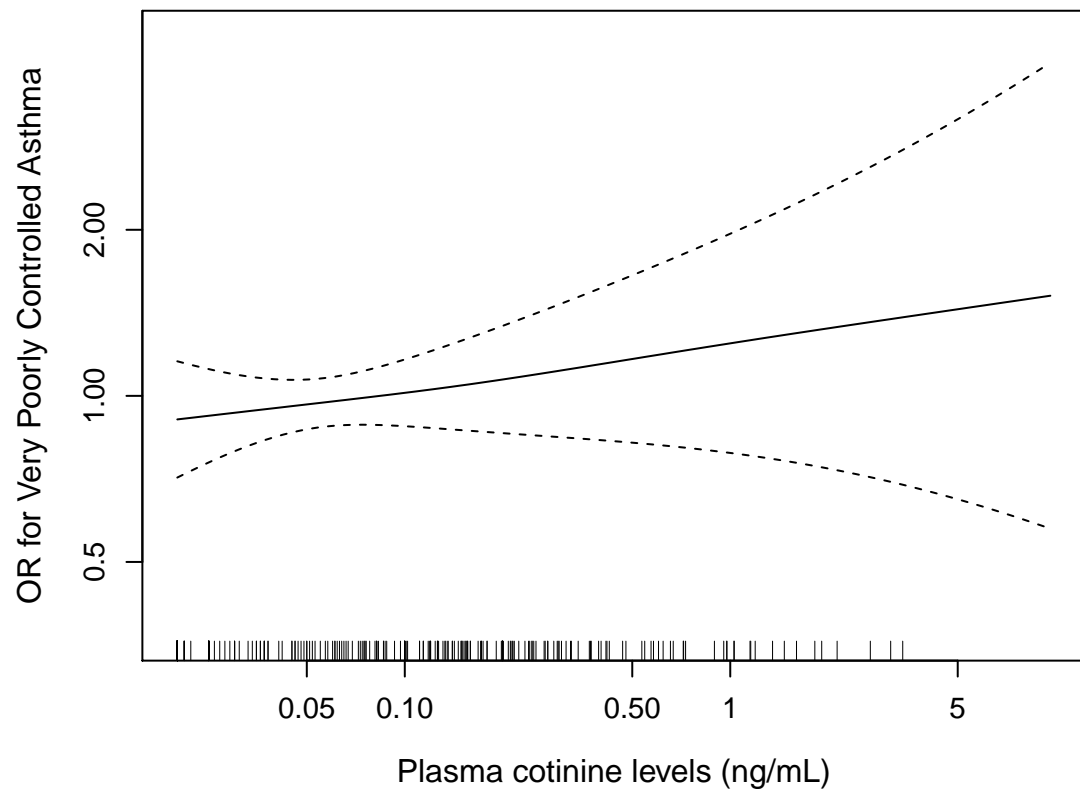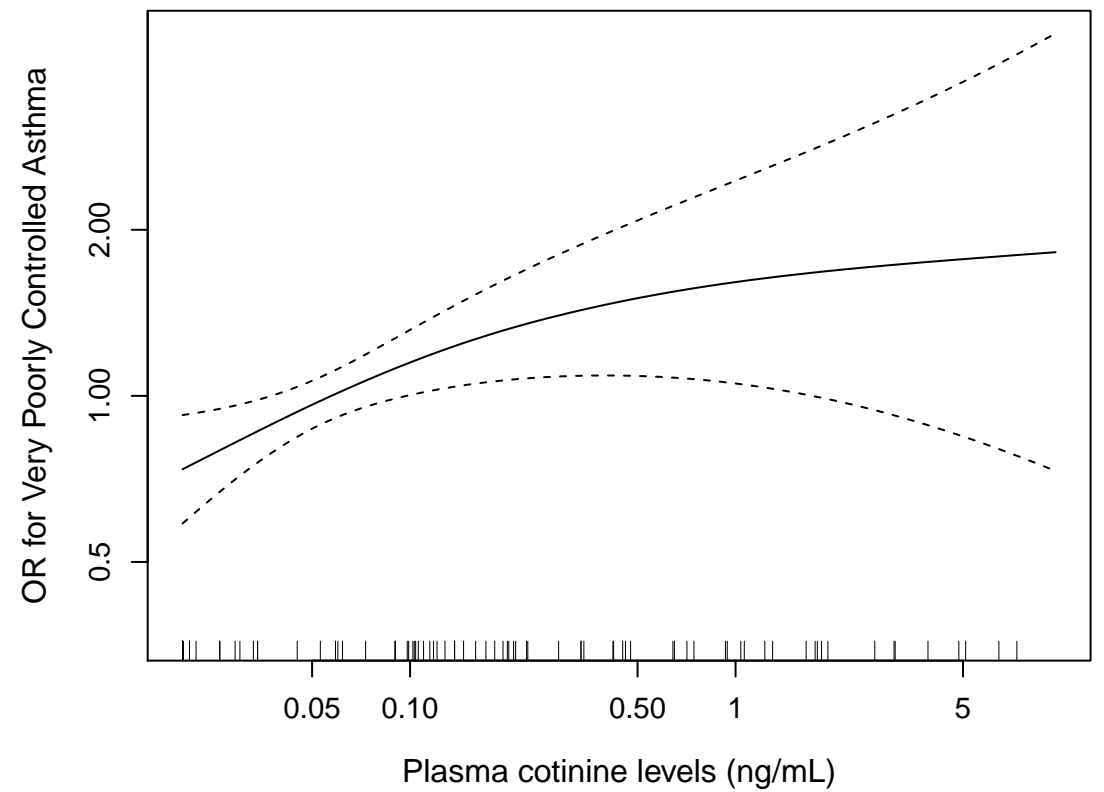

Supplement: NIHMS989472-supplement-Supplemental.pdf [file NIHMS989472-supplement-Supplemental.pdf]
